# Supplementary material
Source: publisher site journal article supplement (https://edge.sagepub.com/system/files/appendix_a_2.pdf)
Supplement: Supplementary file 1 [file appendix_a_2.pdf]

# APPENDIX A - STATISTICAL CALCULATIONS

Calculation formulas and examples are provided for descriptive and inferential statistics discussed in Chapters 7 and 9.

## DESCRIPTIVE STATISTICS

These examples use the data set ( $X$  values): 4, 3, 5, 3, 2, 4, 5, 3, 2, 1.

| Statistic                   | Formula/<br>Definition                          | Calculations                                                                                                                                                                            |
|-----------------------------|-------------------------------------------------|-----------------------------------------------------------------------------------------------------------------------------------------------------------------------------------------|
| Mean ( $M$ )                | $M = \frac{\sum X}{n}$                          | $M = \frac{(4 + 3 + 5 + 3 + 2 + 4 + 5 + 3 + 2 + 1)}{10} = \frac{32}{10} = 3.2$                                                                                                          |
| Median                      | Middle score or average of middle scores        | Order scores from lowest to highest: 1, 2, 2, 3, 3, 3, 4, 4, 4, 5, 5<br>Average middle scores: $(3 + 3) / 2 = 3$                                                                        |
| Mode                        | Most common score or scores                     | 3                                                                                                                                                                                       |
| Range                       | Difference between highest and lowest scores    | Range = $(5 - 1) = 4$                                                                                                                                                                   |
| Variance                    | $\text{Variance} = \frac{\sum(X - M)^2}{n - 1}$ | $\text{Variance} = \frac{[(4 - 3.2)^2 + (3 - 3.2)^2 + (5 - 3.2)^2 + (3 - 3.2)^2 + (2 - 3.2)^2 + (4 - 3.2)^2 + (5 - 3.2)^2 + (3 - 3.2)^2 + (2 - 3.2)^2 + (1 - 3.2)^2]}{(10 - 1)} = 1.73$ |
| Standard deviation ( $SD$ ) | $SD = \sqrt{\frac{\sum(X - M)^2}{n - 1}}$       | $SD = \sqrt{\frac{[(4 - 3.2)^2 + (3 - 3.2)^2 + (5 - 3.2)^2 + (3 - 3.2)^2 + (2 - 3.2)^2 + (4 - 3.2)^2 + (5 - 3.2)^2 + (3 - 3.2)^2 + (2 - 3.2)^2 + (1 - 3.2)^2]}{(10 - 1)}} = 1.32$       |

Note:  $\Sigma$  = sum all values after this symbol;  $n$  = number of scores.

## INFERENCE STATISTICS

| Test                         | Example                                                                                                                                                                                                                                                                                                                                                                                                                                                                                                                                                                                                                                                                                                                                                                                                                                                                                                                                                                                                                                                                                                                                                                  |
|------------------------------|--------------------------------------------------------------------------------------------------------------------------------------------------------------------------------------------------------------------------------------------------------------------------------------------------------------------------------------------------------------------------------------------------------------------------------------------------------------------------------------------------------------------------------------------------------------------------------------------------------------------------------------------------------------------------------------------------------------------------------------------------------------------------------------------------------------------------------------------------------------------------------------------------------------------------------------------------------------------------------------------------------------------------------------------------------------------------------------------------------------------------------------------------------------------------|
| One-sample $t$ test          | <p>Sample values [<math>X</math> values]: 4, 3, 5, 3, 2, 4, 5, 3, 2, 1</p> <p>Population mean (<math>\mu</math>) = 3.0, <math>n</math> is the number of scores in the sample</p> $t = \frac{(M - \mu)}{SD/\sqrt{n}} = \frac{(3.2 - 3.0)}{1.32/\sqrt{10}} = \frac{.2}{.42} = .48.$ <p>This calculated <math>t</math> value is then compared with the appropriate <math>t</math> critical value (based on alpha and <math>df</math> of [<math>n - 1</math>]) to determine significance. See Statistical Tables section of this appendix.</p>                                                                                                                                                                                                                                                                                                                                                                                                                                                                                                                                                                                                                               |
| Independent samples $t$ test | <p>Sample 1 values [<math>X_1</math> values]: 4, 3, 5, 3, 2, 4, 5, 3, 2, 1</p> <p>Sample 2 values [<math>X_2</math> values]: 2, 3, 2, 3, 2, 2, 4, 3, 2, 2</p> $t = \frac{(M_1 - M_2)}{\sqrt{s_p^2/n_1 + s_p^2/n_2}}$ <p><math>s_p^2</math> [pooled variance]—based on variance of each sample and <math>n</math> for each sample</p> $s_p^2 = \frac{(n_1 - 1)(SD_1^2) + (n_2 - 1)(SD_2^2)}{(n_1 - 1) + (n_2 - 1)}$ <p><math>SD_1^2 = 1.73</math> (from Descriptive Statistics section)</p> $M_2 = \frac{2 + 3 + 2 + 3 + 2 + 2 + 4 + 3 + 2 + 2}{10} = 2.5$ $SD_2^2 = \frac{[(2 - 2.5)^2 + (3 - 2.5)^2 + (2 - 2.5)^2 + (3 - 2.5)^2 + (2 - 2.5)^2 + (2 - 2.5)^2 + (4 - 2.5)^2 + (3 - 2.5)^2 + (2 - 2.5)^2]}{(10 - 1)} = .5$ $s_p^2 = \frac{(10 - 1)(1.73) + (10 - 1)(.5)}{(10 - 1) + (10 - 1)} = \frac{15.57 + 4.5}{18} = 1.12$ $t = \frac{(3.2 - 2.5)}{\sqrt{1.12/10 + 1.12/10}} = \frac{.7}{.47} = 1.49$ <p>This calculated <math>t</math> value is then compared with the appropriate <math>t</math> critical value (based on alpha and <math>df</math> of [<math>n_1 + n_2 - 2</math>]) to determine significance. See Statistical Tables section of this appendix.</p> |

| Test                                           | Example                                                                                                                                                                                                                                                                                                                                                                                                                                                                                                                                                                                                                                                                                                                                                                                                                                                                                                                                                                                                                                                                                                                                                                                                                                                                                                                                                                                                                                                                                                                                                                                                                                                                                                                                                                                                                |
|------------------------------------------------|------------------------------------------------------------------------------------------------------------------------------------------------------------------------------------------------------------------------------------------------------------------------------------------------------------------------------------------------------------------------------------------------------------------------------------------------------------------------------------------------------------------------------------------------------------------------------------------------------------------------------------------------------------------------------------------------------------------------------------------------------------------------------------------------------------------------------------------------------------------------------------------------------------------------------------------------------------------------------------------------------------------------------------------------------------------------------------------------------------------------------------------------------------------------------------------------------------------------------------------------------------------------------------------------------------------------------------------------------------------------------------------------------------------------------------------------------------------------------------------------------------------------------------------------------------------------------------------------------------------------------------------------------------------------------------------------------------------------------------------------------------------------------------------------------------------------|
| Related/<br>paired<br>samples <i>t</i><br>test | <p>Condition 1 values: 4, 3, 5, 3, 2, 4, 5, 3, 2, 1</p> <p>Condition 2 values from same or matched subjects: 2, 3, 2, 3, 2, 2, 4, 3, 2, 2</p> <p><i>t</i> is calculated in this test based on difference scores for each participant or across matched pairs. Thus, difference scores are first calculated by subtracting the score in Condition 2 from the score for Condition 1 for each participant (e.g., 4 – 2 for Participant 1).</p> <p>Difference scores (<i>D</i> values): 2, 0, 3, 0, 0, 2, 1, 0, 0, –1</p> $= \frac{(2 + 0 + 3 + 0 + 0 + 2 + 1 + 0 + 0 - 1)}{10} = .7$ $SD \text{ of } D (SD_D) = \sqrt{\frac{\sum(D - M_D)^2}{n - 1}} =$ $\sqrt{\frac{[(2 - .7)^2 + (0 - .7)^2 + (3 - .7)^2 + (0 - .7)^2 + (0 - .7)^2 + (2 - .7)^2 + (1 - .7)^2 + (0 - .7)^2 + (0 - .7)^2 + (-1 - .7)^2]}{(10 - 1)}} = \sqrt{\frac{14.1}{9}} = 1.25$ $t = \frac{M_D}{SD_D/\sqrt{n}} = \frac{.7}{1.25/\sqrt{10}} = \frac{.7}{.4} = 1.75$ <p>This calculated <i>t</i> value is then compared with the appropriate <i>t</i> critical value (based on alpha and <i>df</i> of [<i>n</i> – 1]) to determine significance. See Statistical Tables section of this appendix.</p>                                                                                                                                                                                                                                                                                                                                                                                                                                                                                                                                                                                                                                                   |
| One-way,<br>between-<br>subjects<br>ANOVA      | <p>Sample 1 (<i>X</i><sub>1</sub> values): 10, 15, 20, 13 (<i>M</i><sub>1</sub> = 14.50)</p> <p>Sample 2 (<i>X</i><sub>2</sub> values): 15, 25, 30, 25 (<i>M</i><sub>2</sub> = 23.75)</p> <p>Sample 3 (<i>X</i><sub>3</sub> values): 20, 17, 25, 20 (<i>M</i><sub>3</sub> = 20.50)</p> <p>Overall mean for all samples (<i>M</i><sub><i>T</i></sub>) = 19.58</p> $F = \frac{SS_A/a - 1}{SS_{\text{error}}/a(n - 1)}$ <p><i>SS</i><sub><i>A</i></sub> = <i>n</i>∑(<i>M</i><sub><i>A</i></sub> – <i>M</i><sub><i>T</i></sub>)<sup>2</sup> Sum of squared deviations for Factor A term [<i>SS</i><sub><i>A</i></sub>], <i>n</i> = number of scores per sample, <i>M</i><sub><i>A</i></sub> indicates each sample mean</p> $SS_A = 4[(14.5 - 19.58)^2 + (23.75 - 19.58)^2 + (20.5 - 19.58)^2]$ $= 4[25.81 + 17.39 + .85] = 4[44.05] = 176.2$ <p><i>a</i> – 1 = 3 – 1 = 2, <i>a</i> = number of groups in Factor A (<i>df</i> for Factor A term)</p> <p>Sum of squared deviations for error term [<i>SS</i><sub>error</sub>], <i>X</i> is an individual score, <i>M</i><sub><i>A</i></sub> is the sample mean for that score.</p> $SS_{\text{error}} = [(10 - 14.5)^2 + (15 - 14.5)^2 + (20 - 14.5)^2 + (13 - 14.5)^2 + (15 - 23.75)^2 + (25 - 23.75)^2 + (30 - 23.75)^2 + (25 - 23.75)^2 + (20 - 20.5)^2 + (17 - 20.5)^2 + (25 - 20.5)^2 + (20 - 20.5)^2]$ $= [20.25 + .25 + 30.25 + 2.25 + 76.56 + 1.56 + 39.06 + 1.56 + .25 + 12.25 + 20.25 + .25] = 204.74$ <p><i>a</i> (<i>n</i> – 1) = 3 (4 – 1) = 9 (<i>df</i> for error term)</p> $F = \frac{176.20/2}{204.74/9} = \frac{88.1}{22.75} = 3.87$ <p>This calculated <i>F</i> value is then compared with the appropriate <i>F</i> critical value (based on alpha and <i>df</i> values) to determine significance. See Statistical Tables section of this appendix.</p> |

(Continued)

(Continued)

| Test                              | Example                                                                                                                                                                                                                                                                                                                                                                                                                                                                                                                                                                                                                                                                                                                                                                                                                                                                                                                                                                                                                                                                                                                                                                                                                                                                                                                                                                                                                                                                                                                                                                                                                                                                                                                                                                                                                                                                                                                                                                                                                                                                                                                                                                                                                                                                                                                                                                                                                                                                                                                                                                                                                                                                                                                                                                                                                                                                                                                                                                                             |
|-----------------------------------|-----------------------------------------------------------------------------------------------------------------------------------------------------------------------------------------------------------------------------------------------------------------------------------------------------------------------------------------------------------------------------------------------------------------------------------------------------------------------------------------------------------------------------------------------------------------------------------------------------------------------------------------------------------------------------------------------------------------------------------------------------------------------------------------------------------------------------------------------------------------------------------------------------------------------------------------------------------------------------------------------------------------------------------------------------------------------------------------------------------------------------------------------------------------------------------------------------------------------------------------------------------------------------------------------------------------------------------------------------------------------------------------------------------------------------------------------------------------------------------------------------------------------------------------------------------------------------------------------------------------------------------------------------------------------------------------------------------------------------------------------------------------------------------------------------------------------------------------------------------------------------------------------------------------------------------------------------------------------------------------------------------------------------------------------------------------------------------------------------------------------------------------------------------------------------------------------------------------------------------------------------------------------------------------------------------------------------------------------------------------------------------------------------------------------------------------------------------------------------------------------------------------------------------------------------------------------------------------------------------------------------------------------------------------------------------------------------------------------------------------------------------------------------------------------------------------------------------------------------------------------------------------------------------------------------------------------------------------------------------------------------|
| Factorial, between-subjects ANOVA | <p>Samples for two factors (A and B), each with two levels (1 and 2)</p> <p>Sample A1, B1 (<math>X_{A_1, B_1}</math> values): 67, 80, 75, 77, 78<br/> <math>(M_{A_1, B_1} = 75.40)</math></p> <p>Sample A2, B1 (<math>X_{A_2, B_1}</math> values): 65, 59, 70, 62, 60<br/> <math>(M_{A_2, B_1} = 63.20)</math></p> <p>Sample A1, B2 (<math>X_{A_1, B_2}</math> values): 59, 60, 67, 52, 60<br/> <math>(M_{A_1, B_2} = 59.60)</math></p> <p>Sample A2, B2 (<math>X_{A_2, B_2}</math> values): 87, 90, 82, 86, 85<br/> <math>(M_{A_2, B_2} = 86.00)</math></p> <p>Overall means for Factor A: <math>M_{A_1} = 67.50</math>, <math>M_{A_2} = 74.6</math></p> <p>Overall means for Factor B: <math>M_{B_1} = 69.30</math>, <math>M_{B_2} = 72.80</math></p> <p>Overall mean for all scores: <math>M_T = 71.05</math></p> <p><math>a = 2</math> (number of levels for Factor A)<br/> <math>b = 2</math> (number of levels for Factor B)<br/> <math>n = 5</math> (number of scores per group)</p> <p>Three effects tested: Main effect of Factor A (<math>F_A</math>), Main effect of Factor B (<math>F_B</math>), and Interaction of A and B (<math>F_{A \times B}</math>)</p> $F_A = \frac{SS_A/a - 1}{SS_{error}/ab(n - 1)}$ <p><math>(a - 1)</math> is <math>df</math> for Factor A term, <math>ab(n - 1)</math> is <math>df</math> for error term</p> $F_B = \frac{SS_B/b - 1}{SS_{error}/ab(n - 1)}$ <p><math>(b - 1)</math> is <math>df</math> for Factor B term</p> $F_{A \times B} = \frac{SS_{A \times B}/(a - 1)(b - 1)}{SS_{error}/ab(n - 1)}$ <p><math>(a - 1)(b - 1)</math> is <math>df</math> for interaction <math>A \times B</math> term</p> $SS_A = 5(2) [(67.5 - 71.05)^2 + (74.6 - 71.05)^2] = 252$ $SS_{error} = [67 - 75.4]^2 + [80 - 75.4]^2 + [75 - 75.4]^2 + [77 - 75.4]^2 + [78 - 75.4]^2 + [65 - 63.2]^2 + [59 - 63.2]^2 + [70 - 63.2]^2 + [62 - 63.2]^2 + [60 - 63.2]^2 + [59 - 59.6]^2 + [60 - 59.6]^2 + [67 - 59.6]^2 + [52 - 59.6]^2 + [60 - 59.6]^2 + [87 - 86]^2 + [90 - 86]^2 + [82 - 86]^2 + [86 - 86]^2 + [85 - 86]^2 = 327.2$ $F_A = \frac{252/(2 - 1)}{327.2/[2(2)(5 - 1)]} = \frac{252}{20.45} = 12.32$ $SS_B = 5(2) [(69.3 - 71.05)^2 + (72.8 - 71.05)^2] = 61.25$ $F_B = \frac{61.25/2 - 1}{327.2/[2(2)(5 - 1)]} = \frac{61.25}{20.45} = 3.00$ <p><math>SS_{A \times B} = n \sum (M_{AB} - M_A - M_B + M_T)^2</math>, where <math>M_{AB}</math> is the <math>AB</math> condition mean, <math>M_A</math> is the mean for that level of Factor A, and <math>M_B</math> is the mean for that level of Factor B.</p> $SS_{A \times B} = 5 [(75.4 - 67.5 - 69.3 + 71.05)^2 + (86 - 74.6 - 72.8 + 71.05)^2] = 931.20$ $F_{A \times B} = \frac{931.20/[(2 - 1)]}{327.2/[2(2)(5 - 1)]} = \frac{931.20}{20.45} = 45.54$ <p>Each of these calculated <math>F</math> values is then compared with the appropriate <math>F</math> critical value (based on alpha and <math>df</math> values) to determine significance. See Statistical Tables section of this appendix.</p> |

| Test                    | Example                                                                                                                                                                                                                                                                                                                                                                                                                                                                                                                                                                                                                                                                                                                                                                                                                                                                                                                                                                                                                                                                                                                                                                                                                                                                                                                                                                                                                                      |
|-------------------------|----------------------------------------------------------------------------------------------------------------------------------------------------------------------------------------------------------------------------------------------------------------------------------------------------------------------------------------------------------------------------------------------------------------------------------------------------------------------------------------------------------------------------------------------------------------------------------------------------------------------------------------------------------------------------------------------------------------------------------------------------------------------------------------------------------------------------------------------------------------------------------------------------------------------------------------------------------------------------------------------------------------------------------------------------------------------------------------------------------------------------------------------------------------------------------------------------------------------------------------------------------------------------------------------------------------------------------------------------------------------------------------------------------------------------------------------|
| Pearson $r$ correlation | <p>Measure 1 values (<math>X</math> values): 4, 3, 5, 3, 2, 4, 5, 3, 2, 1 (<math>M_x = 3.2</math>)</p> <p>Measure 2 values (<math>Y</math> values): 2, 3, 2, 3, 2, 2, 4, 3, 2, 2 (<math>M_y = 2.5</math>)</p> $r = \frac{\Sigma[(X - M_x)(Y - M_y)]}{\sqrt{\Sigma[(X - M_x)^2(Y - M_y)^2]}}$ $= \frac{[(4 - 3.2)(2 - 2.5) + (3 - 3.2)(3 - 2.5) + (5 - 3.2)(2 - 2.5) + (3 - 3.2)(3 - 2.5) + (2 - 3.2)(2 - 2.5) + (4 - 3.2)(2 - 2.5) + (5 - 3.2)(4 - 2.5) + (3 - 3.2)(3 - 2.5) + (2 - 3.2)(2 - 2.5) + (1 - 3.2)(2 - 2.5)]}{\sqrt{[(4 - 3.2)^2 + (3 - 3.2)^2 + (5 - 3.2)^2 + (3 - 3.2)^2 + (2 - 3.2)^2 + (4 - 3.2)^2 + (5 - 3.2)^2 + (3 - 3.2)^2 + (2 - 3.2)^2 + (1 - 3.2)^2]}}$ $= \frac{[-.4 + -.1 + -.9 + -.1 + .6 + -.4 + 2.7 + -.1 + .6 + 1.1]}{\sqrt{[0.64 + 0.04 + 3.24 + 0.04 + 1.44 + 0.64 + 3.24 + 0.04 + 1.44 + 4.84]}}$ $= \frac{3}{\sqrt{[15.6][4.5]}} = \frac{3}{8.38} = .36$ <p>This calculated <math>r</math> value is then compared with the appropriate <math>r</math> critical value (based on alpha and <math>df</math> of <math>[n - 2]</math>) to determine significance. See Statistical Tables section of this appendix.</p>                                                                                                                                                                                                                                                                                            |
| Linear regression       | <p>Predictor variable values (<math>X</math> values): 4, 3, 5, 3, 2, 4, 5, 3, 2, 1 (<math>M_x = 3.2</math>)</p> <p>Outcome variable values (<math>Y</math> values): 2, 3, 2, 3, 2, 2, 4, 3, 2, 2 (<math>M_y = 2.5</math>)</p> <p><math>\hat{Y} = b - X + a</math>: regression line to predict <math>Y</math> value (<math>\hat{Y}</math>) from the value of <math>X</math>, must calculate <math>b</math> (slope of the line) and <math>a</math> (the intercept of the line which is the value of <math>Y</math> when <math>X = 0</math>)</p> $b = \frac{\Sigma(X - M_x)(Y - M_y)}{\Sigma(X - M_x)^2}$ <p>the numerator of this equation is equivalent to the numerator of the Pearson <math>r</math> calculation shown in that section (3.00); the denominator is the sum of squared deviations for the predictor variable <math>X</math> (<math>SS_x</math>).</p> $SS_x = [(4 - 3.2)^2 + (3 - 3.2)^2 + (5 - 3.2)^2 + (3 - 3.2)^2 + (2 - 3.2)^2 + (4 - 3.2)^2 + (5 - 3.2)^2 + (3 - 3.2)^2 + (2 - 3.2)^2 + (1 - 3.2)^2] = 15.6$ <p><math>b = \frac{3}{15.6} = .19</math>. This is the slope of the "best fit" line.</p> <p><math>a = M_y - b(M_x) = 2.5 - .19(3.2) = 1.89</math>. This is the intercept for the "best fit" line.</p> <p>Thus, the regression equation is</p> $\hat{Y} = .19X + 1.89.$ <p>This equation can be used to predict a value of the outcome variable <math>Y</math> from the predictor variable <math>X</math>.</p> |

(Continued)

(Continued)

| Test                                                                                                                                                                                                                                            | Example                                                                                                                                                                                                                                                                                                         |         |         |         |       |     |    |   |    |    |   |   |   |       |    |    |  |
|-------------------------------------------------------------------------------------------------------------------------------------------------------------------------------------------------------------------------------------------------|-----------------------------------------------------------------------------------------------------------------------------------------------------------------------------------------------------------------------------------------------------------------------------------------------------------------|---------|---------|---------|-------|-----|----|---|----|----|---|---|---|-------|----|----|--|
| Pearson<br>chi-square<br>test                                                                                                                                                                                                                   | Frequency data from Example in Chapter 9:                                                                                                                                                                                                                                                                       |         |         |         |       |     |    |   |    |    |   |   |   |       |    |    |  |
|                                                                                                                                                                                                                                                 | <table border="1"> <thead> <tr> <th></th> <th>Older</th> <th>Younger</th> <th>Total</th> </tr> </thead> <tbody> <tr> <th>Yes</th> <td>8</td> <td>4</td> <td>12</td> </tr> <tr> <th>No</th> <td>2</td> <td>6</td> <td>8</td> </tr> <tr> <th>Total</th> <td>10</td> <td>10</td> <td></td> </tr> </tbody> </table> |         | Older   | Younger | Total | Yes | 8  | 4 | 12 | No | 2 | 6 | 8 | Total | 10 | 10 |  |
|                                                                                                                                                                                                                                                 |                                                                                                                                                                                                                                                                                                                 | Older   | Younger | Total   |       |     |    |   |    |    |   |   |   |       |    |    |  |
|                                                                                                                                                                                                                                                 | Yes                                                                                                                                                                                                                                                                                                             | 8       | 4       | 12      |       |     |    |   |    |    |   |   |   |       |    |    |  |
|                                                                                                                                                                                                                                                 | No                                                                                                                                                                                                                                                                                                              | 2       | 6       | 8       |       |     |    |   |    |    |   |   |   |       |    |    |  |
|                                                                                                                                                                                                                                                 | Total                                                                                                                                                                                                                                                                                                           | 10      | 10      |         |       |     |    |   |    |    |   |   |   |       |    |    |  |
|                                                                                                                                                                                                                                                 | The first step is to calculate expected frequencies for each combination of these factors if there is no relationship between these factors:                                                                                                                                                                    |         |         |         |       |     |    |   |    |    |   |   |   |       |    |    |  |
|                                                                                                                                                                                                                                                 | $f_e = \frac{f_{\text{column}}(f_{\text{row}})}{n}$                                                                                                                                                                                                                                                             |         |         |         |       |     |    |   |    |    |   |   |   |       |    |    |  |
|                                                                                                                                                                                                                                                 | Expected older (yes): $f_e = \frac{10(12)}{20} = 6$                                                                                                                                                                                                                                                             |         |         |         |       |     |    |   |    |    |   |   |   |       |    |    |  |
|                                                                                                                                                                                                                                                 | Expected older (no): $f_e = \frac{10(8)}{20} = 4$                                                                                                                                                                                                                                                               |         |         |         |       |     |    |   |    |    |   |   |   |       |    |    |  |
| Expected younger (yes): $f_e = \frac{10(12)}{20} = 6$                                                                                                                                                                                           |                                                                                                                                                                                                                                                                                                                 |         |         |         |       |     |    |   |    |    |   |   |   |       |    |    |  |
| Expected younger (no): $f_e = \frac{10(8)}{20} = 4$                                                                                                                                                                                             |                                                                                                                                                                                                                                                                                                                 |         |         |         |       |     |    |   |    |    |   |   |   |       |    |    |  |
| Expected frequencies:                                                                                                                                                                                                                           |                                                                                                                                                                                                                                                                                                                 |         |         |         |       |     |    |   |    |    |   |   |   |       |    |    |  |
| <table border="1"> <thead> <tr> <th></th> <th>Older</th> <th>Younger</th> </tr> </thead> <tbody> <tr> <th>Yes</th> <td>6</td> <td>6</td> </tr> <tr> <th>No</th> <td>4</td> <td>4</td> </tr> </tbody> </table>                                   |                                                                                                                                                                                                                                                                                                                 | Older   | Younger | Yes     | 6     | 6   | No | 4 | 4  |    |   |   |   |       |    |    |  |
|                                                                                                                                                                                                                                                 | Older                                                                                                                                                                                                                                                                                                           | Younger |         |         |       |     |    |   |    |    |   |   |   |       |    |    |  |
| Yes                                                                                                                                                                                                                                             | 6                                                                                                                                                                                                                                                                                                               | 6       |         |         |       |     |    |   |    |    |   |   |   |       |    |    |  |
| No                                                                                                                                                                                                                                              | 4                                                                                                                                                                                                                                                                                                               | 4       |         |         |       |     |    |   |    |    |   |   |   |       |    |    |  |
| The chi-square statistic is calculated from the difference between the observed and expected frequencies:                                                                                                                                       |                                                                                                                                                                                                                                                                                                                 |         |         |         |       |     |    |   |    |    |   |   |   |       |    |    |  |
| $\chi^2 = \sum \frac{(f_{\text{observed}} - f_{\text{expected}})^2}{f_{\text{expected}}} = \frac{(8-6)^2}{6} + \frac{(4-6)^2}{6} + \frac{(2-4)^2}{4} + \frac{(6-4)^2}{4}$ $= .67 + .67 + 1 + 1 = 3.34$                                          |                                                                                                                                                                                                                                                                                                                 |         |         |         |       |     |    |   |    |    |   |   |   |       |    |    |  |
| This calculated $\chi^2$ value is then compared with the appropriate $\chi^2$ critical value (based on alpha and $df$ of number of columns $\times$ number of rows) to determine significance. See Statistical Tables section of this appendix. |                                                                                                                                                                                                                                                                                                                 |         |         |         |       |     |    |   |    |    |   |   |   |       |    |    |  |

## STATISTICAL TABLES

The tables in this section provide critical statistical values for the calculations in the section Inferential Statistics.

### Critical $t$ Values

| <i>One-Tailed Test</i> |       |       |       |        |        |        |
|------------------------|-------|-------|-------|--------|--------|--------|
|                        | 0.25  | 0.10  | 0.05  | 0.025  | 0.01   | 0.005  |
| <i>Two-Tailed Test</i> |       |       |       |        |        |        |
| <i>df</i>              | 0.50  | 0.20  | 0.10  | 0.05   | 0.02   | 0.01   |
| 1                      | 1.000 | 3.078 | 6.314 | 12.706 | 31.821 | 63.657 |
| 2                      | 0.816 | 1.886 | 2.920 | 4.303  | 6.965  | 9.925  |
| 3                      | 0.765 | 1.638 | 2.353 | 3.182  | 4.541  | 5.841  |
| 4                      | 0.741 | 1.533 | 2.132 | 2.776  | 3.747  | 4.604  |
| 5                      | 0.727 | 1.476 | 2.015 | 2.571  | 3.365  | 4.032  |
| 6                      | 0.718 | 1.440 | 1.943 | 2.447  | 3.143  | 3.707  |
| 7                      | 0.711 | 1.415 | 1.895 | 2.365  | 2.998  | 3.499  |
| 8                      | 0.706 | 1.397 | 1.860 | 2.306  | 2.896  | 3.355  |
| 9                      | 0.703 | 1.383 | 1.833 | 2.262  | 2.821  | 3.250  |
| 10                     | 0.700 | 1.372 | 1.812 | 2.228  | 2.764  | 3.169  |
| 11                     | 0.697 | 1.363 | 1.796 | 2.201  | 2.718  | 3.106  |
| 12                     | 0.695 | 1.356 | 1.782 | 2.179  | 2.681  | 3.055  |
| 13                     | 0.694 | 1.350 | 1.771 | 2.160  | 2.650  | 3.012  |
| 14                     | 0.692 | 1.345 | 1.761 | 2.145  | 2.624  | 2.977  |
| 15                     | 0.691 | 1.341 | 1.753 | 2.131  | 2.602  | 2.947  |
| 16                     | 0.690 | 1.337 | 1.746 | 2.120  | 2.583  | 2.921  |
| 17                     | 0.689 | 1.333 | 1.740 | 2.110  | 2.567  | 2.898  |
| 18                     | 0.688 | 1.330 | 1.734 | 2.101  | 2.552  | 2.878  |
| 19                     | 0.688 | 1.328 | 1.729 | 2.093  | 2.539  | 2.861  |
| 20                     | 0.687 | 1.325 | 1.725 | 2.086  | 2.528  | 2.845  |
| 21                     | 0.686 | 1.323 | 1.721 | 2.080  | 2.518  | 2.831  |

(Continued)

(Continued)

| <i>One-Tailed Test</i> |       |       |       |       |       |       |
|------------------------|-------|-------|-------|-------|-------|-------|
|                        | 0.25  | 0.10  | 0.05  | 0.025 | 0.01  | 0.005 |
| <i>Two-Tailed Test</i> |       |       |       |       |       |       |
| <i>df</i>              | 0.50  | 0.20  | 0.10  | 0.05  | 0.02  | 0.01  |
| 22                     | 0.686 | 1.321 | 1.717 | 2.074 | 2.508 | 2.819 |
| 23                     | 0.685 | 1.319 | 1.714 | 2.069 | 2.500 | 2.807 |
| 24                     | 0.685 | 1.318 | 1.711 | 2.064 | 2.492 | 2.797 |
| 25                     | 0.684 | 1.316 | 1.708 | 2.060 | 2.485 | 2.787 |
| 26                     | 0.684 | 1.315 | 1.706 | 2.056 | 2.479 | 2.779 |
| 27                     | 0.684 | 1.314 | 1.703 | 2.052 | 2.473 | 2.771 |
| 28                     | 0.683 | 1.313 | 1.701 | 2.048 | 2.467 | 2.763 |
| 29                     | 0.683 | 1.311 | 1.699 | 2.045 | 2.462 | 2.756 |
| 30                     | 0.683 | 1.310 | 1.697 | 2.042 | 2.457 | 2.750 |
| 40                     | 0.681 | 1.303 | 1.684 | 2.021 | 2.423 | 2.704 |
| 60                     | 0.679 | 1.296 | 1.671 | 2.000 | 2.390 | 2.660 |
| 120                    | 0.677 | 1.289 | 1.658 | 1.980 | 2.358 | 2.617 |
| $\infty$               | 0.674 | 1.282 | 1.645 | 1.960 | 2.326 | 2.576 |

### Critical *F* Values

$p = .05$  in bold

$p = .01$  in italics

| Degrees of Freedom for Denominator | Degrees of Freedom for Numerator |              |              |              |              |              |              |              |              |              |
|------------------------------------|----------------------------------|--------------|--------------|--------------|--------------|--------------|--------------|--------------|--------------|--------------|
|                                    | 1                                | 2            | 3            | 4            | 5            | 6            | 7            | 8            | 9            | 10           |
| 1                                  | <b>161.4</b>                     | <b>199.5</b> | <b>215.7</b> | <b>224.6</b> | <b>230.2</b> | <b>234.0</b> | <b>236.8</b> | <b>240.5</b> | <b>241.9</b> | <b>243.9</b> |
|                                    | <i>4052</i>                      | <i>5000</i>  | <i>5403</i>  | <i>5625</i>  | <i>5764</i>  | <i>5859</i>  | <i>5928</i>  | <i>5981</i>  | <i>6022</i>  | <i>6056</i>  |
| 2                                  | <b>18.51</b>                     | <b>19.00</b> | <b>19.16</b> | <b>19.25</b> | <b>19.30</b> | <b>19.33</b> | <b>19.35</b> | <b>19.37</b> | <b>19.38</b> | <b>19.40</b> |
|                                    | <i>98.5</i>                      | <i>99.0</i>  | <i>99.2</i>  | <i>99.2</i>  | <i>99.3</i>  | <i>99.3</i>  | <i>99.4</i>  | <i>99.4</i>  | <i>99.4</i>  | <i>99.4</i>  |
| 3                                  | <b>10.3</b>                      | <b>9.55</b>  | <b>9.28</b>  | <b>9.12</b>  | <b>9.01</b>  | <b>8.94</b>  | <b>8.89</b>  | <b>8.85</b>  | <b>8.81</b>  | <b>8.79</b>  |
|                                    | <i>34.1</i>                      | <i>30.8</i>  | <i>29.5</i>  | <i>28.7</i>  | <i>28.2</i>  | <i>27.9</i>  | <i>27.7</i>  | <i>27.5</i>  | <i>27.3</i>  | <i>27.2</i>  |



| Degrees of Freedom for Denominator | Degrees of Freedom for Numerator |             |             |             |             |             |             |             |             |             |
|------------------------------------|----------------------------------|-------------|-------------|-------------|-------------|-------------|-------------|-------------|-------------|-------------|
|                                    | 1                                | 2           | 3           | 4           | 5           | 6           | 7           | 8           | 9           | 10          |
| 4                                  | <b>7.71</b>                      | <b>6.94</b> | <b>6.59</b> | <b>6.39</b> | <b>6.26</b> | <b>6.16</b> | <b>6.09</b> | <b>6.04</b> | <b>6.00</b> | <b>5.96</b> |
|                                    | 21.2                             | 18.0        | 16.7        | 16.0        | 15.5        | 15.2        | 15.0        | 14.8        | 14.7        | 14.5        |
| 5                                  | <b>6.61</b>                      | <b>5.79</b> | <b>5.41</b> | <b>5.19</b> | <b>5.05</b> | <b>4.95</b> | <b>4.88</b> | <b>4.82</b> | <b>4.77</b> | <b>4.74</b> |
|                                    | 16.3                             | 13.3        | 12.1        | 11.4        | 11.0        | 10.7        | 10.5        | 10.3        | 10.2        | 10.1        |
| 6                                  | <b>5.99</b>                      | <b>5.14</b> | <b>4.76</b> | <b>4.53</b> | <b>4.39</b> | <b>4.28</b> | <b>4.21</b> | <b>4.15</b> | <b>4.10</b> | <b>4.06</b> |
|                                    | 13.7                             | 10.9        | 9.78        | 9.15        | 8.75        | 8.47        | 8.26        | 8.10        | 7.98        | 7.87        |
| 7                                  | <b>5.59</b>                      | <b>4.74</b> | <b>4.35</b> | <b>4.12</b> | <b>3.97</b> | <b>3.87</b> | <b>3.79</b> | <b>3.73</b> | <b>3.68</b> | <b>3.64</b> |
|                                    | 12.2                             | 9.55        | 8.45        | 7.85        | 7.46        | 7.19        | 6.99        | 6.84        | 6.72        | 6.62        |
| 8                                  | <b>5.32</b>                      | <b>4.46</b> | <b>4.07</b> | <b>3.84</b> | <b>3.69</b> | <b>3.58</b> | <b>3.50</b> | <b>3.44</b> | <b>3.39</b> | <b>3.35</b> |
|                                    | 11.3                             | 8.65        | 7.59        | 7.01        | 6.63        | 6.37        | 6.18        | 6.03        | 5.91        | 5.81        |
| 9                                  | <b>5.12</b>                      | <b>4.26</b> | <b>3.86</b> | <b>3.63</b> | <b>3.48</b> | <b>3.37</b> | <b>3.29</b> | <b>3.23</b> | <b>3.18</b> | <b>3.14</b> |
|                                    | 10.6                             | 8.02        | 6.99        | 6.42        | 6.06        | 5.80        | 5.61        | 5.47        | 5.35        | 5.26        |
| 10                                 | <b>4.96</b>                      | <b>4.10</b> | <b>3.71</b> | <b>3.48</b> | <b>3.33</b> | <b>3.22</b> | <b>3.14</b> | <b>3.07</b> | <b>3.02</b> | <b>2.98</b> |
|                                    | 10.0                             | 7.56        | 6.55        | 5.99        | 5.64        | 5.39        | 5.20        | 5.06        | 4.94        | 4.85        |
| 11                                 | <b>4.84</b>                      | <b>3.98</b> | <b>3.59</b> | <b>3.36</b> | <b>3.20</b> | <b>3.09</b> | <b>3.01</b> | <b>2.95</b> | <b>2.90</b> | <b>2.85</b> |
|                                    | 9.65                             | 7.21        | 6.22        | 5.67        | 5.32        | 5.07        | 4.89        | 4.74        | 4.63        | 4.54        |
| 12                                 | <b>4.75</b>                      | <b>3.89</b> | <b>3.49</b> | <b>3.26</b> | <b>3.11</b> | <b>3.00</b> | <b>2.91</b> | <b>2.85</b> | <b>2.80</b> | <b>2.75</b> |
|                                    | 9.33                             | 6.93        | 5.95        | 5.41        | 5.06        | 4.82        | 4.64        | 4.50        | 4.39        | 4.30        |
| 13                                 | <b>4.67</b>                      | <b>3.81</b> | <b>3.41</b> | <b>3.18</b> | <b>3.03</b> | <b>2.92</b> | <b>2.83</b> | <b>2.77</b> | <b>2.71</b> | <b>2.67</b> |
|                                    | 9.07                             | 6.70        | 5.74        | 5.21        | 4.86        | 4.62        | 4.44        | 4.30        | 4.19        | 4.10        |
| 14                                 | <b>4.60</b>                      | <b>3.74</b> | <b>3.34</b> | <b>3.11</b> | <b>2.96</b> | <b>2.85</b> | <b>2.76</b> | <b>2.70</b> | <b>2.65</b> | <b>2.60</b> |
|                                    | 8.86                             | 6.51        | 5.56        | 5.04        | 4.69        | 4.46        | 4.28        | 4.14        | 4.03        | 3.94        |
| 15                                 | <b>4.54</b>                      | <b>3.68</b> | <b>3.29</b> | <b>3.06</b> | <b>2.90</b> | <b>2.79</b> | <b>2.71</b> | <b>2.64</b> | <b>2.59</b> | <b>2.54</b> |
|                                    | 8.68                             | 6.36        | 5.42        | 4.89        | 4.56        | 4.32        | 4.14        | 4.00        | 3.89        | 3.80        |
| 16                                 | <b>4.49</b>                      | <b>3.63</b> | <b>3.24</b> | <b>3.01</b> | <b>2.85</b> | <b>2.74</b> | <b>2.66</b> | <b>2.59</b> | <b>2.54</b> | <b>2.49</b> |
|                                    | 8.53                             | 6.23        | 5.29        | 4.77        | 4.44        | 4.20        | 4.03        | 3.89        | 3.78        | 3.69        |
| 17                                 | <b>4.45</b>                      | <b>3.59</b> | <b>3.20</b> | <b>2.96</b> | <b>2.81</b> | <b>2.70</b> | <b>2.61</b> | <b>2.55</b> | <b>2.49</b> | <b>2.45</b> |
|                                    | 8.40                             | 6.11        | 5.18        | 4.67        | 4.34        | 4.10        | 3.93        | 3.79        | 3.68        | 3.59        |

(Continued)

(Continued)

| Degrees of Freedom for Denominator | Degrees of Freedom for Numerator |             |             |             |             |             |             |             |             |             |
|------------------------------------|----------------------------------|-------------|-------------|-------------|-------------|-------------|-------------|-------------|-------------|-------------|
|                                    | 1                                | 2           | 3           | 4           | 5           | 6           | 7           | 8           | 9           | 10          |
| 18                                 | <b>4.41</b>                      | <b>3.55</b> | <b>3.16</b> | <b>2.93</b> | <b>2.77</b> | <b>2.66</b> | <b>2.58</b> | <b>2.51</b> | <b>2.46</b> | <b>2.41</b> |
|                                    | 8.29                             | 6.01        | 5.09        | 4.58        | 4.25        | 4.01        | 3.84        | 3.71        | 3.60        | 3.51        |
| 19                                 | <b>4.38</b>                      | <b>3.52</b> | <b>3.13</b> | <b>2.90</b> | <b>2.74</b> | <b>2.63</b> | <b>2.54</b> | <b>2.48</b> | <b>2.42</b> | <b>2.38</b> |
|                                    | 8.18                             | 5.93        | 5.01        | 4.50        | 4.17        | 3.94        | 3.77        | 3.63        | 3.52        | 3.43        |
| 20                                 | <b>4.35</b>                      | <b>3.49</b> | <b>3.10</b> | <b>2.87</b> | <b>2.71</b> | <b>2.60</b> | <b>2.51</b> | <b>2.45</b> | <b>2.39</b> | <b>2.35</b> |
|                                    | 8.10                             | 5.85        | 4.94        | 4.43        | 4.10        | 3.87        | 3.70        | 3.56        | 3.46        | 3.37        |
| 22                                 | <b>4.30</b>                      | <b>3.44</b> | <b>3.05</b> | <b>2.82</b> | <b>2.66</b> | <b>2.55</b> | <b>2.46</b> | <b>2.40</b> | <b>2.34</b> | <b>2.30</b> |
|                                    | 7.95                             | 5.72        | 4.82        | 4.31        | 3.99        | 3.76        | 3.59        | 3.45        | 3.35        | 3.26        |
| 30                                 | <b>4.17</b>                      | <b>3.32</b> | <b>2.92</b> | <b>2.69</b> | <b>2.53</b> | <b>2.42</b> | <b>2.33</b> | <b>2.27</b> | <b>2.21</b> | <b>2.16</b> |
|                                    | 7.56                             | 5.39        | 4.51        | 4.02        | 3.70        | 3.47        | 3.30        | 3.17        | 3.07        | 2.98        |
| 40                                 | <b>4.08</b>                      | <b>3.23</b> | <b>2.84</b> | <b>2.61</b> | <b>2.45</b> | <b>2.34</b> | <b>2.25</b> | <b>2.18</b> | <b>2.12</b> | <b>2.08</b> |
|                                    | 7.31                             | 5.18        | 4.31        | 3.83        | 3.51        | 3.29        | 3.12        | 2.99        | 2.89        | 2.80        |
| 60                                 | <b>4.00</b>                      | <b>3.15</b> | <b>2.76</b> | <b>2.53</b> | <b>2.37</b> | <b>2.25</b> | <b>2.17</b> | <b>2.10</b> | <b>2.04</b> | <b>1.99</b> |
|                                    | 7.08                             | 4.98        | 4.13        | 3.65        | 3.34        | 3.12        | 2.95        | 2.82        | 2.72        | 2.63        |
| 120                                | <b>3.92</b>                      | <b>3.07</b> | <b>2.68</b> | <b>2.45</b> | <b>2.29</b> | <b>2.17</b> | <b>2.09</b> | <b>2.02</b> | <b>1.96</b> | <b>1.91</b> |
|                                    | 6.85                             | 4.79        | 3.95        | 3.48        | 3.17        | 2.96        | 2.79        | 2.66        | 2.56        | 2.47        |
| $\infty$                           | <b>3.84</b>                      | <b>3.00</b> | <b>2.60</b> | <b>2.37</b> | <b>2.21</b> | <b>2.10</b> | <b>2.00</b> | <b>1.94</b> | <b>1.88</b> | <b>1.83</b> |
|                                    | 6.63                             | 4.61        | 3.78        | 3.32        | 3.02        | 2.80        | 2.64        | 2.51        | 2.41        | 2.32        |

### Critical $r$ Values

| <i>One-Tailed Test</i> |      |       |       |       |
|------------------------|------|-------|-------|-------|
|                        | 0.05 | 0.025 | 0.01  | 0.005 |
| <i>Two-Tailed Test</i> |      |       |       |       |
| <i>df</i>              | 0.10 | 0.05  | 0.02  | 0.01  |
| 1                      | .988 | .997  | .9995 | .9999 |
| 2                      | .900 | .950  | .980  | .990  |
| 3                      | .805 | .878  | .934  | .959  |
| 4                      | .729 | .811  | .882  | .917  |

| <i>One-Tailed Test</i> |      |       |      |       |
|------------------------|------|-------|------|-------|
|                        | 0.05 | 0.025 | 0.01 | 0.005 |
| <i>Two-Tailed Test</i> |      |       |      |       |
| <i>df</i>              | 0.10 | 0.05  | 0.02 | 0.01  |
| 5                      | .669 | .754  | .833 | .874  |
| 6                      | .622 | .707  | .789 | .834  |
| 7                      | .582 | .666  | .750 | .798  |
| 8                      | .549 | .632  | .716 | .765  |
| 9                      | .521 | .602  | .685 | .735  |
| 10                     | .497 | .576  | .658 | .708  |
| 11                     | .476 | .553  | .634 | .684  |
| 12                     | .458 | .532  | .612 | .661  |
| 13                     | .441 | .514  | .592 | .641  |
| 14                     | .426 | .497  | .574 | .623  |
| 15                     | .412 | .482  | .558 | .606  |
| 16                     | .400 | .468  | .542 | .590  |
| 17                     | .389 | .456  | .528 | .575  |
| 18                     | .378 | .444  | .516 | .561  |
| 19                     | .369 | .433  | .503 | .549  |
| 20                     | .360 | .423  | .492 | .537  |
| 21                     | .352 | .413  | .482 | .526  |
| 22                     | .344 | .404  | .472 | .515  |
| 23                     | .337 | .396  | .462 | .505  |
| 24                     | .330 | .388  | .453 | .496  |
| 25                     | .323 | .381  | .445 | .487  |
| 26                     | .317 | .374  | .437 | .479  |
| 27                     | .311 | .367  | .430 | .471  |
| 28                     | .306 | .361  | .423 | .463  |
| 29                     | .301 | .355  | .416 | .456  |
| 30                     | .296 | .349  | .409 | .449  |

(Continued)

(Continued)

| <b>One-Tailed Test</b> |      |       |      |       |
|------------------------|------|-------|------|-------|
|                        | 0.05 | 0.025 | 0.01 | 0.005 |
| <b>Two-Tailed Test</b> |      |       |      |       |
| <i>df</i>              | 0.10 | 0.05  | 0.02 | 0.01  |
| 35                     | .275 | .325  | .381 | .418  |
| 40                     | .257 | .304  | .358 | .393  |
| 45                     | .243 | .288  | .338 | .372  |
| 50                     | .231 | .273  | .322 | .354  |
| 60                     | .211 | .250  | .295 | .325  |
| 70                     | .195 | .232  | .274 | .302  |
| 80                     | .183 | .217  | .256 | .283  |
| 90                     | .173 | .205  | .242 | .267  |
| 100                    | .164 | .195  | .230 | .254  |

### Critical $X^2$ Values

| <b>Level of Significance</b> |       |       |       |
|------------------------------|-------|-------|-------|
| <i>df</i>                    | 0.05  | 0.025 | 0.01  |
| 1                            | 3.84  | 5.02  | 6.64  |
| 2                            | 5.99  | 7.38  | 9.21  |
| 3                            | 7.81  | 9.35  | 11.34 |
| 4                            | 9.49  | 11.14 | 13.28 |
| 5                            | 11.07 | 12.83 | 15.09 |
| 6                            | 12.59 | 14.45 | 16.81 |
| 7                            | 14.07 | 16.01 | 18.48 |
| 8                            | 15.51 | 17.53 | 20.09 |
| 9                            | 16.92 | 19.02 | 21.67 |
| 10                           | 18.31 | 20.48 | 23.21 |
| 11                           | 19.68 | 21.92 | 24.72 |
| 12                           | 21.03 | 23.34 | 26.22 |
| 13                           | 22.36 | 24.74 | 27.69 |

| Level of Significance |       |       |       |
|-----------------------|-------|-------|-------|
| <i>df</i>             | 0.05  | 0.025 | 0.01  |
| 14                    | 23.68 | 26.11 | 29.14 |
| 15                    | 25.00 | 27.49 | 30.58 |
| 16                    | 26.30 | 28.85 | 32.00 |
| 17                    | 27.59 | 30.19 | 33.41 |
| 18                    | 28.87 | 31.53 | 34.80 |
| 19                    | 30.14 | 32.85 | 36.19 |
| 20                    | 31.41 | 34.17 | 37.57 |
| 21                    | 32.67 | 35.48 | 38.93 |
| 22                    | 33.92 | 36.78 | 40.29 |
| 23                    | 35.17 | 38.08 | 41.64 |
| 24                    | 36.42 | 39.36 | 42.98 |
| 25                    | 37.65 | 40.65 | 44.31 |
| 26                    | 38.88 | 41.92 | 45.64 |
| 27                    | 40.11 | 43.19 | 46.96 |
| 28                    | 41.34 | 44.46 | 48.28 |
| 29                    | 42.56 | 45.72 | 49.59 |
| 30                    | 43.77 | 46.98 | 50.89 |
| 40                    | 55.76 | 59.34 | 63.69 |
| 50                    | 67.50 | 71.42 | 76.15 |

## SPSS OUTPUT

Figure A.1 shows SPSS output for the example data sets discussed in Chapter 9.

### Example 1: One-Sample $t$ Test

**FIGURE A.1** ■ Output Window From the One-Sample  $t$  Test for Example 1

$t$  Test

#### One-Sample Statistics

|                    | <i>N</i> | Mean    | Std. Deviation | Std. Error Mean |
|--------------------|----------|---------|----------------|-----------------|
| Recognition Scores | 10       | 53.5000 | 10.40566       | 3.29056         |

#### One-Sample Test

|                    | Test Value = 50 |           |                   |                 |                                           |         |
|--------------------|-----------------|-----------|-------------------|-----------------|-------------------------------------------|---------|
|                    |                 |           |                   |                 | 95% Confidence Interval of the Difference |         |
|                    | <i>t</i>        | <i>df</i> | Sig. (two-tailed) | Mean Difference | Lower                                     | Upper   |
| Recognition Scores | 1.064           | 9         | .315              | 3.50000         | -3.9438                                   | 10.9438 |

The output from the test contains several important values. The sample mean can be seen in the first box along with the standard deviation. These values are circled in the output in red in Figure A.1. These are the standard descriptive statistics included in the output for a  $t$  test. The  $t$  test values are included in the second box in the output. These values are circled in green in Figure A.1. The  $t$  value (1.064 for Example 1), the degrees of freedom (abbreviated  $df$ , calculated from the sample size; see discussion in Chapter 7), and the  $p$  value listed in the Sig. column (which stands for the level of significance or  $p$  value) of the box. The default test is a two-tailed test in SPSS for  $t$  tests, but you can convert the value to a one-tailed test by dividing the  $p$  value in half if the means differ in the predicted direction. (The one-tailed test has a critical region at one end of the  $t$  distribution that is twice the size of the critical region for a two-tailed test—thus, the one-tailed test has a  $p$  value that is half the  $p$  value for the two-tailed test.) Some newer versions of SPSS provide both the one-tailed and two-tailed  $p$  values in the output. The  $p$  value in the output for Example 1 is .315. In Example 1, if there is an effect, we expect the mean recognition score to be higher than 50%. In other words, a one-tailed test is warranted. Thus,

we must divide the given  $p$  value in half to obtain a  $p = .1575$  for this one-tailed  $t$  test. Because this value is *not* equal to or lower than alpha of .05 (the standard alpha level used in behavioral research), the null hypothesis cannot be rejected and must be retained. In other words, there is no evidence that participants in the sample experiment remembered the subliminal ads because their performance was not better than what is expected by chance. If you need to report the outcome of this test in APA style, you might include a statement such as, “The mean recognition score for subliminal ads ( $M = 53.50$ ) was not significantly higher than the chance value of 50%,  $t(9) = 1.06$ ,  $p = .16$ , one-tailed.” The statistical values (rounded here to two significant digits) are stated as support for a statement about the results of the study. If a two-tailed hypothesis had been made for this study, then the result would be reported as “Not significantly different.”

## Example 2: Independent-Samples $t$ Test

**FIGURE A.2** ■ Output Window From the Independent-Samples  $t$  Test for Example 2

$t$  Test

| Independent Samples Test |                             |                                         |      |                              |        |                |                 |                       |         |                                           |  |
|--------------------------|-----------------------------|-----------------------------------------|------|------------------------------|--------|----------------|-----------------|-----------------------|---------|-------------------------------------------|--|
|                          |                             | Levene's Test for Equality of Variances |      | t-test for Equality of Means |        |                |                 |                       |         | 95% Confidence Interval of the Difference |  |
|                          |                             | F                                       | Sig. | t                            | df     | Sig (2-tailed) | Mean Difference | Std. Error Difference | Lower   | Upper                                     |  |
| Recognition Scores       | Equal variances assumed     | 2.217                                   | .154 | .107                         | 18     | .916           | .6000           | 5.62870               | -11.225 | 12.4255                                   |  |
|                          | Equal variances not assumed |                                         |      | .107                         | 16.361 | .916           | .60000          | 5.62870               | -11.311 | 12.5109                                   |  |

### Group Statistics

|                    | Gender | N  | Mean    | Std. Deviation | Std. Error Mean |
|--------------------|--------|----|---------|----------------|-----------------|
| Recognition Scores | Men    | 10 | 53.5000 | 10.40566       | 3.29056         |
|                    | Women  | 10 | 52.9000 | 14.44107       | 4.56667         |

In Figure A.2, one box in the output provides descriptive statistics for each group. These values are circled in the output in red. The other box contains the test statistic and  $p$  value. These values are circled in the output in green. For Example 2, the  $t$  value is .107, and the  $p$  value (see the Sig. column) is .916. This is a two-tailed test (it is possible that either men or women could have higher recognition scores), so the  $p$  value given can be directly compared with alpha. Once again, the  $p$  value is not equal to or lower than the alpha of .05, and the null hypothesis cannot

be rejected. Thus, there is no evidence in these data that men and women differ in their memories for subliminal ads. If there was a significant difference, we could look at the means to determine which group was higher.

### Example 3: Paired-Samples $t$ Test

**FIGURE A.3** ■ Output Window From the Paired-Samples  $t$  Test for Example 3

$t$  Test

|        |               | Paired Samples Statistics |          |                |                 |
|--------|---------------|---------------------------|----------|----------------|-----------------|
|        |               | Mean                      | <i>N</i> | Std. Deviation | Std. Error Mean |
| Pair 1 | Standard Ads  | 53.5000                   | 10       | 10.40566       | 3.29056         |
|        | Emotional Ads | 66.3000                   | 10       | 12.68464       | 4.01123         |

#### Paired Samples Correlations

|        |                                | <i>N</i> | Correlation | Sig. |
|--------|--------------------------------|----------|-------------|------|
| Pair 1 | Standard Ads and Emotional Ads | 10       | .118        | .745 |

#### Paired Samples Test

|        |                                | Paired Differences                        |                |                 |         |         |          |           |                 |
|--------|--------------------------------|-------------------------------------------|----------------|-----------------|---------|---------|----------|-----------|-----------------|
|        |                                | 95% Confidence Interval of the Difference |                |                 |         |         |          |           |                 |
|        |                                | Mean                                      | Std. Deviation | Std. Error Mean | Lower   | Upper   | <i>t</i> | <i>df</i> | Sig. (2-tailed) |
| Pair 1 | Standard Ads and Emotional Ads | -12.800                                   | 15.42581       | 4.87807         | -23.835 | -1.7650 | -2.624   | 9         | .028            |

The output in Figure A.3 indicates descriptive statistics in the first box (circled in the output in red) and the test statistic and  $p$  value in the third box (circled in green). For Example 3, the  $t$  value is  $-2.624$  with a  $p$  value of  $.028$ . For this example, the  $p$  value is lower than alpha of  $.05$ . Thus, the null hypothesis (that there is no difference between the ad types) can be rejected, and the alternative hypothesis (that there is a difference between the ad types) can be accepted. The means indicate which ad type was remembered better: In this case, the emotional ads ( $M = 66.3$ ) were remembered better than the standard ads ( $M = 53.5$ ),  $t(9) = -2.62$ ,  $p = .03$ . The second box of the output provides a test of the relationship between the two sets of scores (see the Chi-square and Pearson  $r$  tests below for more information about tests for relationships).



### Example 4: Between-Subjects ANOVA

**FIGURE A.4** ■ Output Window From the Between-Subjects ANOVA for Example 4

#### One way

#### Descriptives

Test Score - Percentage Correct

|                          | N  | Mean    | Std. Deviation | Std. Error | 95% Confidence Interval for Mean |             |
|--------------------------|----|---------|----------------|------------|----------------------------------|-------------|
|                          |    |         |                |            | Lower Bound                      | Upper Bound |
| Paper text               | 10 | 66.2000 | 13.08774       | 4.13871    | 56.8376                          | 75.5624     |
| Computer text            | 10 | 80.6000 | 11.23684       | 3.55340    | 72.5616                          | 88.6384     |
| Computer with voice text | 10 | 83.0000 | 7.37865        | 2.33333    | 77.7216                          | 88.2784     |
| Total                    | 30 | 76.6000 | 12.89106       | 2.35357    | 71.7864                          | 81.4136     |

#### Descriptives

Test Score - Percentage Correct

|                          | Minimum | Maximum |
|--------------------------|---------|---------|
| Paper text               | 45.00   | 90.00   |
| Computer text            | 54.00   | 92.00   |
| Computer with voice text | 72.00   | 93.00   |
| Total                    | 45.00   | 93.00   |

#### ANOVA

Test Score - Percentage Correct

|                | Sum of Squares | df | Mean Square | F     | Sig. |
|----------------|----------------|----|-------------|-------|------|
| Between groups | 1651.200       | 2  | 825.600     | 7.036 | .003 |
| Within groups  | 3168.000       | 27 | 117.333     |       |      |
| Total          | 4819.200       | 29 |             |       |      |

## Post Hoc Tests

## Multiple Comparisons

Dependent Variable: Test Score - Percentage Correct

| LSD<br>(I) Text<br>Condition   | (J) Text<br>Condition       | Mean<br>Difference<br>(I - J) | Std. Error | Sig. | 95% Confidence Interval |                |
|--------------------------------|-----------------------------|-------------------------------|------------|------|-------------------------|----------------|
|                                |                             |                               |            |      | Lower<br>Bound          | Upper<br>Bound |
| Paper text                     | Computer text               | -14.4000*                     | 4.84424    | .006 | -24.3396                | -4.4604        |
|                                | Computer with<br>voice text | -16.8000*                     | 4.84424    | .002 | -26.7396                | -6.8604        |
| Computer text                  | Paper text                  | 14.40000*                     | 4.84424    | .006 | 4.4604                  | 24.3396        |
|                                | Computer with<br>voice text | -2.40000                      | 4.84424    | .624 | -12.3396                | 7.5396         |
| Computer<br>with voice<br>text | Paper text                  | 16.80000*                     | 4.84424    | .002 | 6.8604                  | 26.7396        |
|                                | Computer text               | 2.40000                       | 4.84424    | .624 | -7.5396                 | 12.3396        |

Note: \*The mean difference is significant at the .05 level.

The output window in Figure A.4 contains a box with descriptive statistics (if you choose that option) circled in red, a box with the  $F$  statistic and  $p$  value (circled in green), and a box with the post hoc tests (if you choose that option). The between-groups row of the ANOVA box indicates a significant effect of text condition with  $F = 7.036$  and a  $p$  value of .003. The test is significant because the  $p$  value is lower than an alpha of .05. In other words, we can reject the null hypothesis that there is no difference between the condition means. This result might be reported as, "The effect of text condition was significant,  $F(2, 27) = 7.04$ ,  $p = .003$ ." Although this test is significant, it does not tell us which conditions are different from each other.

The post hoc tests indicate which pairs of means are significantly different from one another. Post hoc tests are different from normal sets of  $t$  tests because they adjust for an inflated alpha level. Each time a pairwise comparison is made, it becomes more likely that a Type I error (see Chapter 7) is made. In other words, the likelihood of making a Type I error is higher for multiple  $t$  tests than for a single test. Thus, the post hoc tests keep alpha at .05 for each test by adjusting the alpha level for the set of tests based on the number of tests conducted. These tests are shown in the last box in the output. The LSD test was chosen in this example. The box shows  $p$  values (in the Sig. column circled in blue) lower than .05 for the paper text versus computer text; and paper text versus computer with voice text tests; but not for the computer text versus computer with voice text test. Thus, if we examine the means shown in the first box the output of Figure A.4, we see that both of the computer conditions resulted in higher test scores than the paper text condition, but the two computer conditions do not significantly differ from each other.

## Example 5: Within-Subjects ANOVA

**FIGURE A.5** ■ Output From Output Window for the Within-Subjects ANOVA for Example 5

### General Linear Model

#### Within-Subjects Factors

Measure: MEASURE\_1

| textcond | Dependent Variable |
|----------|--------------------|
| 1        | paper              |
| 2        | comp               |
| 3        | compvoice          |

#### Descriptive Statistics

|                          | Mean    | Std.Deviation | N  |
|--------------------------|---------|---------------|----|
| Paper text               | 66.2000 | 13.08774      | 10 |
| Computer text            | 80.6000 | 11.23684      | 10 |
| Computer with voice text | 83.0000 | 7.37865       | 10 |

#### Multivariate Tests<sup>a</sup>

| Effect   |                    | Value | F                  | Hypothesis df | Error df | Sig. |
|----------|--------------------|-------|--------------------|---------------|----------|------|
| textcond | Pillai's Trace     | .591  | 5.784 <sup>b</sup> | 2.000         | 8.000    | .028 |
|          | Wilks' Lambda      | .409  | 5.784 <sup>b</sup> | 2.000         | 8.000    | .028 |
|          | Hotelling's Trace  | 1.446 | 5.784 <sup>b</sup> | 2.000         | 8.000    | .028 |
|          | Roy's Largest Root | 1.446 | 5.784 <sup>b</sup> | 2.000         | 8.000    | .028 |

<sup>a</sup>Design: Intercept  
Within-Subjects Design: textcond

<sup>b</sup>Exact statistic

#### Mauchly's Test of Sphericity<sup>a</sup>

Measure: MEASURE\_1

| Within-Subjects Effect | Mauchly's W | Approx. Chi-Square | df | Sig. |
|------------------------|-------------|--------------------|----|------|
| textcond               | .975        | .205               | 2  | .902 |

Tests the null hypothesis that the error covariance matrix of the orthonormalized transformed dependent variables is proportional to an identity matrix.

**Mauchly's Test of Sphericity<sup>a</sup>**

Measure: MEASURE\_1

| Within-Subjects Effect | Epsilon <sup>b</sup> |             |             |
|------------------------|----------------------|-------------|-------------|
|                        | Greenhouse-Geisser   | Huynh-Feldt | Lower bound |
| textcond               | .975                 | 1.000       | .500        |

Tests the null hypothesis that the error covariance matrix of the orthonormalized transformed dependent variables is proportional to an identity matrix.

a. Design: Intercept

Within-Subjects Design: textcond

b. May be used to adjust the degrees of freedom for the averaged tests of significance. Corrected tests are displayed in the Tests of Within-Subjects Effects table.

**Tests of Within-Subjects Effects**

Measure: MEASURE\_1

| Source          |                    | Type III Sum of Squares | df     | Mean Square |
|-----------------|--------------------|-------------------------|--------|-------------|
| textcond        | Sphericity Assumed | 1651.200                | 2      | 825.600     |
|                 | Greenhouse-Geisser | 1651.200                | 1.951  | 846.514     |
|                 | Huynh-Feldt        | 1651.200                | 2.000  | 825.600     |
|                 | Lower-bound        | 1651.200                | 1.000  | 1651.200    |
| Error(textcond) | Sphericity Assumed | 2379.467                | 18     | 132.193     |
|                 | Greenhouse-Geisser | 2379.467                | 17.555 | 135.541     |
|                 | Huynh-Feldt        | 2379.467                | 18.000 | 132.193     |
|                 | Lower-bound        | 2379.467                | 9.000  | 264.385     |

**Tests of Within-Subjects Effects**

Measure: MEASURE\_1

| Source          |                    | F     | Sig. |
|-----------------|--------------------|-------|------|
| textcond        | Sphericity Assumed | 6.245 | .009 |
|                 | Greenhouse-Geisser | 6.245 | .009 |
|                 | Huynh-Feldt        | 6.245 | .009 |
|                 | Lower-bound        | 6.245 | .034 |
| Error(textcond) | Sphericity Assumed |       |      |
|                 | Greenhouse-Geisser |       |      |
|                 | Huynh-Feldt        |       |      |
|                 | Lower-bound        |       |      |

(Continued)

**Tests of Within-Subjects Contrasts**

Measure: MEASURE\_1

| Source          | textcond  | Type III Sum of Squares | df | Mean Square | F      | Sig. |
|-----------------|-----------|-------------------------|----|-------------|--------|------|
| textcond        | Linear    | 1411.200                | 1  | 1411.200    | 12.168 | .007 |
|                 | Quadratic | 240.000                 | 1  | 240.000     | 1.617  | .235 |
| Error(textcond) | Linear    | 1043.800                | 9  | 115.978     |        |      |
|                 | Quadratic | 1335.667                | 9  | 115.978     |        |      |

**Tests of Between-Subjects Effects**

Measure: MEASURE\_1

Transformed Variable: Average

| Source    | Type III Sum of Squares | df | Mean Square | F        | Sig. |
|-----------|-------------------------|----|-------------|----------|------|
| Intercept | 176026.800              | 1  | 176026.800  | 2009.099 | .000 |
| Error     | 788.533                 | 9  | 87.615      |          |      |

**Estimated Marginal Means****textcond****Estimates**

Measure: MEASURE\_1

| textcond | Mean   | Std. Error | 95% Confidence Interval |             |
|----------|--------|------------|-------------------------|-------------|
|          |        |            | Lower Bound             | Upper Bound |
| 1        | 66.200 | 4.139      | 56.838                  | 75.562      |
| 2        | 80.600 | 3.553      | 72.562                  | 88.638      |
| 3        | 83.000 | 2.333      | 77.722                  | 88.278      |

### Pairwise Comparisons

Measure: MEASURE\_1

| (I)<br>textcond | (J)<br>textcond | Mean<br>Difference (I - J) | Std. Error | Sig. <sup>a</sup> | 95% Confidence<br>Interval for Difference <sup>a</sup> |                |
|-----------------|-----------------|----------------------------|------------|-------------------|--------------------------------------------------------|----------------|
|                 |                 |                            |            |                   | Lower<br>Bound                                         | Upper<br>Bound |
| 1               | 2               | - 14.400*                  | 5.512      | .028              | -26.869                                                | - 1.931        |
|                 | 3               | - 16.800*                  | 4.816      | .007              | - 27.695                                               | - 5.905        |
| 2               | 1               | 14.400*                    | 5.512      | .028              | 1.931                                                  | 26.869         |
|                 | 3               | - 2.400                    | 5.073      | .647              | -13.876                                                | 9.076          |
| 3               | 1               | 16.800*                    | 4.816      | .007              | 5.905                                                  | 27.695         |
|                 | 2               | 2.400                      | 5.073      | .647              | - 9.076                                                | 13.876         |

Based on estimated marginal means

a. Adjustment for multiple comparisons: Least Significant Difference (equivalent to no adjustments).

\*The mean difference is significant at the .05 level.

### Multivariate Tests

|                    | Value | <i>F</i>           | Hypothesis <i>df</i> | Error <i>df</i> | Sig.        |
|--------------------|-------|--------------------|----------------------|-----------------|-------------|
| Pillai's trace     | .591  | 5.784 <sup>a</sup> | 2.000                | 8.000           | .028        |
| Wilks' lambda      | .409  | 5.784 <sup>a</sup> | 2.000                | 8.000           | <b>.028</b> |
| Hotelling's trace  | 1.446 | 5.784 <sup>a</sup> | 2.000                | 8.000           | .028        |
| Roy's largest root | 1.446 | 5.784 <sup>a</sup> | 2.000                | 8.000           | .028        |

Each *F* tests the multivariate effect of textcond. These tests are based on the linearly independent pairwise comparisons among the estimated marginal means.

The output in Figure A.5 is more complex for the repeated measures test than it is for the other tests we have seen. However, the output still contains the information needed to determine whether the tests are significant. To evaluate the main effect of the text condition, look for the “Tests of Within-Subjects Effects” box. The first row of the last box in the Tests of Within-Subjects Effects section shows the  $F$  and  $p$  values (circled in green). For Example 5, the  $F = 6.245$  and  $p = .009$ . Thus, we can reject the null hypothesis that there is no difference in condition means because the main effect of text condition is significant. The post hoc tests are shown in the box of the output labeled “Pairwise Comparisons.” The conditions are indicated by code value with  $p$  values listed in the Sig. column. As in Example 4, the post hoc tests indicate that learning for the paper text condition (coded as “1”) is lower than both of the computer conditions (coded as “2” and “3”), but the two computer conditions do not significantly differ from each other.

You also see a box in the output in Figure A.5 for Mauchly’s Test of Sphericity (with the  $p$  value circled in blue). Sphericity is an assumption of the repeated measures test. The assumption is that pairs of scores in the population have similar variability. (See Chapter 9 for more discussion of sphericity.) If the sphericity test is significant in the repeated measures output, the  $F$  statistic needs to be adjusted in order to retain accuracy of the test. Thus, the “Tests of Within-Subjects Effects” box contains a few different corrections below the “Sphericity Assumed” row. The sphericity assumed values are used if the sphericity test is not significant. However, if the sphericity test is significant, a correction is used because violations of this assumption can increase the chance of a Type I error (Keppel & Wickens, 2004). A common correction used in psychological research is the Greenhouse-Geisser correction. A full discussion of the correction techniques is provided in Howell’s (2009) statistics text.

### Example 6: Factorial ANOVA

The output in Figure A.6 is similar to that for Example 4; however, three tests of interest appear in the “Tests of Between-Subjects Effects” box (see green circled portion). The two main effects are indicated in the rows with the variable labels (“Study” and “Test” for Example 6). The main effect of study format was significant,  $F(1, 36) = 8.91, p = .005$ ; however, the main effect of test format was not significant,  $F(1, 36) = 1.32, p = .257$ . The means in the Descriptive Statistics box (see red circled portion) indicate that studied pictures ( $M = 80.45$ ) were better remembered than studied words ( $M = 71.50$ ), regardless of test format. This is a common finding in memory studies (Paivio, 2007). However, the interaction between study format and test format was also significant,  $F(1, 36) = 31.96, p < .001$ . Note that the  $p$  value in the output for the interaction is listed as .000. This value represents a value smaller than .0005 that has been rounded to three significant digits. In fact,  $p$  can never equal 0. The convention used in reporting such values is to indicate that the  $p$  was less than .001. Newer versions of SPSS list  $p$  values smaller than .0005 as  $p < .001$ .

**FIGURE A.6** ■ Output From Output Window for the Factorial ANOVA for Example 6**Univariate Analysis of Variance****Between-Subjects Factors**

|              |      | Value Label | N  |
|--------------|------|-------------|----|
| Study format | 1.00 | Picture     | 20 |
|              | 2.00 | Word        | 20 |
| Test format  | 1.00 | Picture     | 20 |
|              | 2.00 | Word        | 20 |

**Descriptive Statistics**

Dependent Variable: Recognition Score

| Study Format | Test Format | Mean    | Std. Deviation | N  |
|--------------|-------------|---------|----------------|----|
| Picture      | Picture     | 87.2000 | 7.29992        | 10 |
|              | Word        | 73.7000 | 13.08986       | 10 |
|              | Total       | 80.4500 | 12.42440       | 20 |
| Word         | Picture     | 61.3000 | 8.52513        | 10 |
|              | Word        | 81.7000 | 7.88881        | 10 |
|              | Total       | 71.5000 | 13.16894       | 20 |
| Total        | Picture     | 74.2500 | 15.36871       | 20 |
|              | Word        | 77.7000 | 11.29089       | 20 |
|              | Total       | 75.9750 | 13.42498       | 40 |

**Tests of Between-Subjects Effects**

Dependent Variable: Recognition Score

| Source          | Type III Sum of Squares | df | Mean Square | F        | Sig. |
|-----------------|-------------------------|----|-------------|----------|------|
| Corrected model | 3793.075 <sup>a</sup>   | 3  | 1264.358    | 14.066   | .000 |
| Intercept       | 230888.025              | 1  | 230888.025  | 2568.673 | .000 |
| Study           | 801.025                 | 1  | 801.025     | 8.912    | .005 |
| Test            | 119.025                 | 1  | 119.025     | 1.324    | .257 |
| Study *test     | 2873.025                | 1  | 2873.025    | 31.963   | .000 |
| Error           | 3235.900                | 36 | 89.886      |          |      |
| Total           | 327917.000              | 40 |             |          |      |
| Corrected Total | 7028.975                | 39 |             |          |      |

a.  $r^2 = .540$  (Adjusted  $r^2 = .501$ )



## Example 7: Chi-Square Test

**FIGURE A.7** ■ Output From Output Window for the Chi-Square Test for Example 7

### Crosstabs

#### Case Processing Summary

|               | Cases    |            |          |            |          |            |
|---------------|----------|------------|----------|------------|----------|------------|
|               | Valid    |            | Missing  |            | Total    |            |
|               | <i>N</i> | Percentage | <i>N</i> | Percentage | <i>N</i> | Percentage |
| Age* Response | 20       | 100.0%     | 0        | .0%        | 20       | 100.0%     |

#### Age\* Response Crosstabulation

##### Count

|       |         | Response |    |       |
|-------|---------|----------|----|-------|
|       |         | Yes      | No | Total |
| Age   | Older   | 8        | 2  | 10    |
|       | Younger | 4        | 6  | 10    |
| Total |         | 12       | 8  | 20    |

#### Chi-square Tests

|                                    | Value              | <i>df</i> | Asymp. Sig.<br>(2-sided) | Exact Sig.<br>(2-sided) | Exact Sig.<br>(1-sided) |
|------------------------------------|--------------------|-----------|--------------------------|-------------------------|-------------------------|
| Pearson chi-square                 | 3.333 <sup>a</sup> | 1         | .068                     |                         |                         |
| Continuity correction <sup>b</sup> | 1.875              | 1         | .171                     |                         |                         |
| Likelihood ratio                   | 3.452              | 1         | .063                     |                         |                         |
| Fisher's exact test                |                    |           |                          | .170                    | .085                    |
| <i>N</i> of valid cases            | 20                 |           |                          |                         |                         |

The output from the chi-square is shown in Figure A.7. The second box in the output shows the cross-tabulation with the number of participants in each condition (Younger/yes, etc.). The values for the chi-square test are shown in the box labeled “Chi-square tests.” The Pearson chi-square value of 3.333 is shown in the first row with its  $p$  value of .068 (see the green circled portion). For this example, the relationship is not significant because the  $p$  value is greater than the alpha level of .05. In other words, the type of response (“yes” or “no”) is not significantly related to the age group of the participants.

### Example 8: Pearson $r$ Correlation Test

**FIGURE A.8** ■ Output From Output Window for the Pearson  $r$  Test for Example 8

| Correlations |                     |         |         |
|--------------|---------------------|---------|---------|
|              |                     | Age     | Days    |
| Age          | Pearson correlation | 1       | -.900** |
|              | Sig. (2-tailed)     |         | .00     |
|              | <i>N</i>            | 20      | 20      |
| Days         | Pearson correlation | -.900** | 1       |
|              | Sig. (2-tailed)     | .000    |         |
|              | <i>N</i>            | 20      | 20      |

In Figure A.8, the Correlations box in the output indicates the Pearson  $r$  value (including the direction of relationship) in the first row and the  $p$  value in the second row (see green circled portion). For Example 8, the variables are significantly related (negatively) with  $r = -.90$  and  $p < .001$ . In other words, in this study, as age increased, the number of days it took participants to remember to mail the card decreased.

### Example 9: Simple Linear Regression

Figure A.9 shows the output from the linear regression. The last box contains the output information needed to determine the regression equation and whether age significantly predicts number of days (see blue circled portion). The  $t$  test in the bottom row provides the significance test (see green circled portion). In this case, the test is significant,  $t(18) = -8.78$ ,  $p < .001$ .

**FIGURE A.9** ■ Output From Output Window for the Simple Linear Regression Test for Example 9

### Regression

#### Variables Entered/Removed<sup>a</sup>

| Model | Variables Entered | Variables Removed | Method |
|-------|-------------------|-------------------|--------|
| 1     | age <sup>b</sup>  | .                 | Enter  |

a. Dependent Variable: days

b. All requested variables entered

#### Model Summary

| Model | <i>r</i>          | <i>r</i> <sup>2</sup> | Adjusted <i>r</i> <sup>2</sup> | Std. Error of the Estimate |
|-------|-------------------|-----------------------|--------------------------------|----------------------------|
| 1     | .900 <sup>a</sup> | .811                  | .800                           | 1.59066                    |

a. Predictors: (Constant), age

#### ANOVA<sup>a</sup>

| Model |            | Sum of Squares | <i>df</i> | Mean Square | <i>F</i> | Sig.              |
|-------|------------|----------------|-----------|-------------|----------|-------------------|
| 1     | Regression | 195.006        | 1         | 195.006     | 77.071   | .000 <sup>b</sup> |
|       | Residual   | 45.544         | 18        | 2.530       |          |                   |
|       | Total      | 240.550        | 19        |             |          |                   |

a. Dependent Variable: days

b. Predictors: (Constant), age

#### Coefficients<sup>a</sup>

| Model |            | Unstandardized Coefficients |            | Standardized Coefficients |          | Sig. |
|-------|------------|-----------------------------|------------|---------------------------|----------|------|
|       |            | <i>B</i>                    | Std. Error | Beta                      | <i>t</i> |      |
| 1     | (Constant) | 9.209                       | .707       |                           | 13.035   | .000 |
|       | Age        | -.113                       | .013       | -.900                     | -8.779   | .000 |

a. Dependent Variable: days
